# Supplementary material for: A fluorometric assay for high-throughput phosphite quantitation in biological and environmental matrices
Source: Royal Society of Chemistry journal article supplement (doi:10.1039/d3an00575e), 2023-01-01
Supplement: d3an00575e1.pdf [file d3an00575e1.pdf]

Supplemental Information

**A Fluorometric Assay for High-throughput Phosphite Quantitation in  
Biological and Environmental Matrices**

*Clara A. Bailey and Brandon L. Greene\**

Department of Chemistry and Biochemistry, University of California, Santa Barbara,  
Santa Barbara, CA 93106

\*Email: [greene@chem.ucsb.edu](mailto:greene@chem.ucsb.edu)

## Table of Contents

|                                                                                            |     |
|--------------------------------------------------------------------------------------------|-----|
| <b>Figure S1.</b> SDS-PAGE gel describing the purification of 17X-PTDH                     | S3  |
| <b>Figure S2.</b> SDS-PAGE gel describing the purification of LDH*                         | S4  |
| <b>Figure S3.</b> Phosphite assay kinetics for 2 µg 17X-PTDH                               | S5  |
| <b>Figure S4.</b> Phosphite assay kinetics profiles between 100–200 mM PMS                 | S6  |
| <b>Figure S5.</b> Dependence of ionic strength of sample on Phi response in the assay.     | S7  |
| <b>Figure S6.</b> LDH* activity in STET buffer                                             | S8  |
| <b>Figure S7.</b> Schematic representation of sample preparation for the Phi assay.        | S9  |
| <b>Figure S8.</b> The effect of LDH* and pyruvate treatment on <i>E. coli</i> cell lysate. | S10 |
| <b>Figure S9.</b> Radish wet weight following growth in soil Phi.                          | S11 |

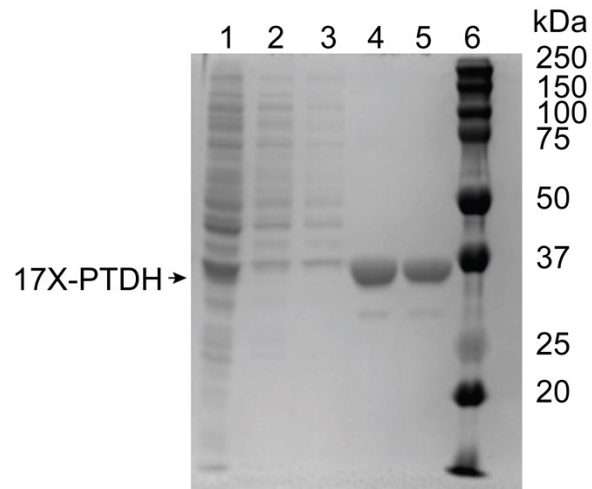

**Figure S1.** SDS-PAGE gel describing the purification of 17X-PTDH. Lanes contain the *E. coli* BL21(DE3) lysate with overexpressed 17X-PTDH (1), Ni-NTA column flow-through (2, 3), eluted final protein fraction (4,5), and molecular weight ladder (6). The 17X-PTDH is 36 kDa.

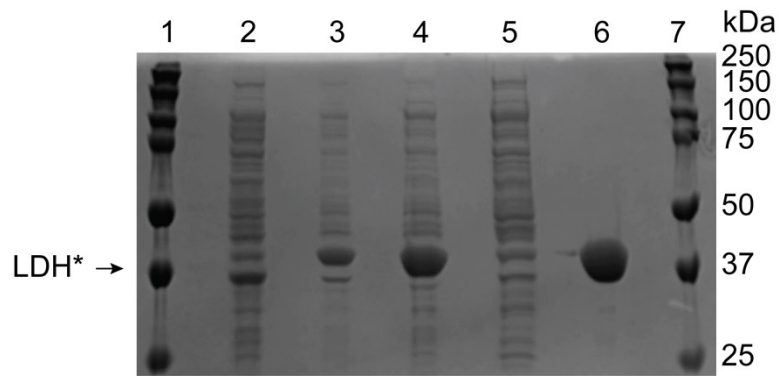

**Figure S2.** SDS-PAGE gel describing the purification of LDH\*. Lanes contain the molecular weight ladder (1), pre-induction *E. coli* BL21(DE3) lysate (2), post-induction *E. coli* BL21(DE3) lysate with overexpressed LDH\* (3), cell lysate (4), Ni-NTA column flow-through (5), final elution protein fraction (6), and the molecular weight ladder (7). The LDH\* is 37 kDa.

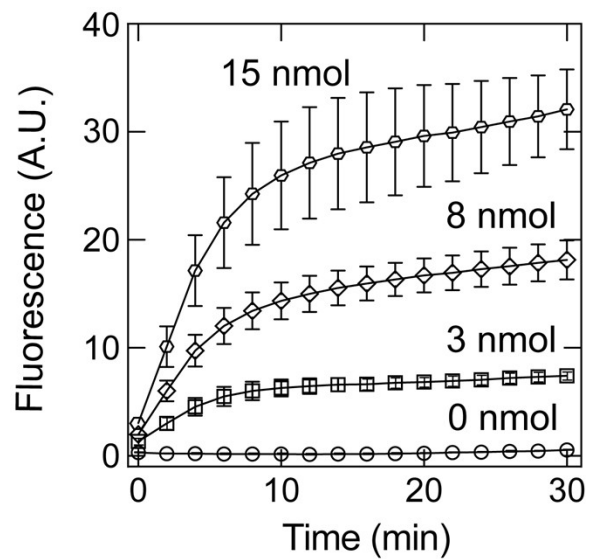

**Figure S3.** Phosphite assay kinetic response for 200 nM 17X-PTDH and 100 mM PMS. Assay reactions containing 0 (circles), 3 (squares), 8 (diamonds), and 15 (hexagons) nmol Phi are shown.

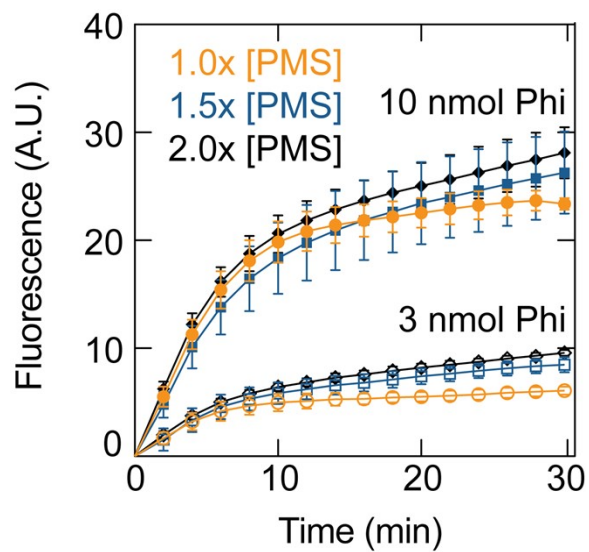

**Figure S4.** Phosphite assay kinetics profile for 2  $\mu\text{g}$  17X-PTDH and 100 (orange circles), 150 (blue squares), or 200 mM (black diamonds) PMS. Assay reactions containing 3 nmol (open shapes) and 10 nmol (filled shapes) Phi are shown.

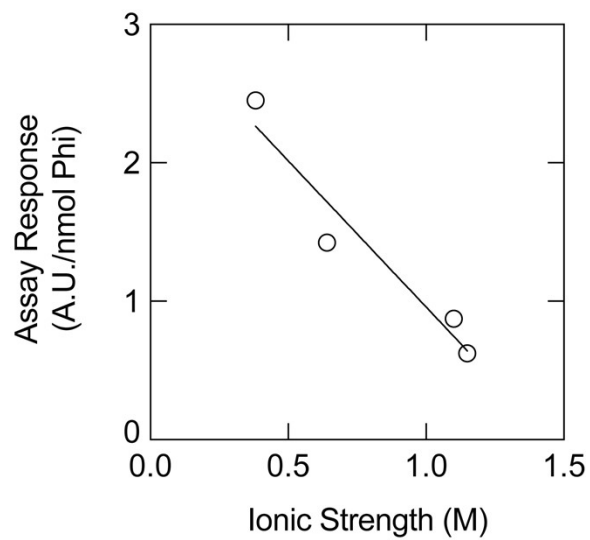

**Figure S5.** Dependence of ionic strength of sample on Phi assay response. Assay response is defined as the slope of the standard addition curve in fluorescence (A.U.) versus nmol Phi added.

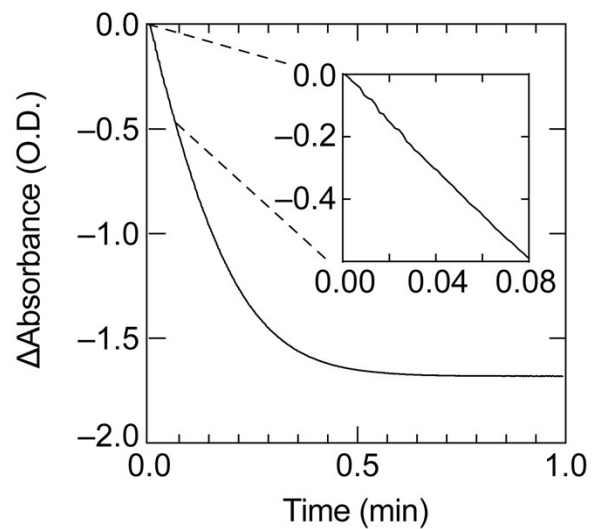

**Figure S6.** Pyruvate-dependent NADH oxidation activity of purified LDH\* in STET buffer as determined by the change in absorbance at 340 nm. The  $k_{\text{cat}}$  was determined from the pseudo-first order regime within the first 5 seconds to be  $1,330 \pm 30 \text{ s}^{-1}$  at room temperature.



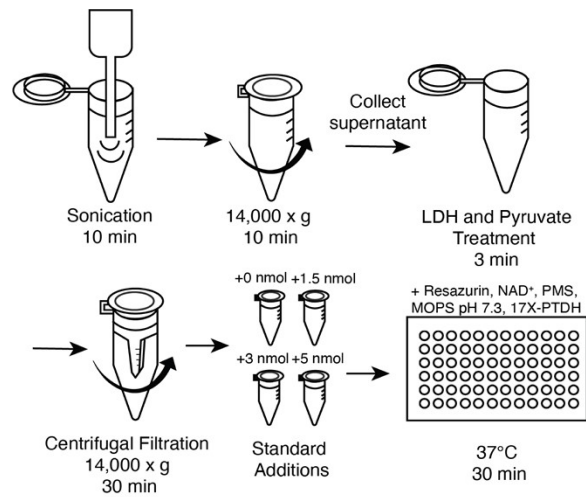

**Figure S7.** Schematic representation of sample preparation for the Phi assay.

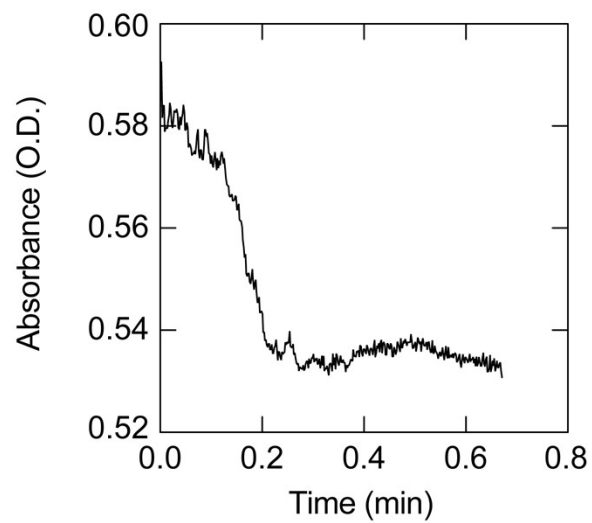

**Figure S8.** The effect of LDH\* and pyruvate treatment on *E. coli* cell lysate based on the absorbance of NAD(P)H at 340 nm.

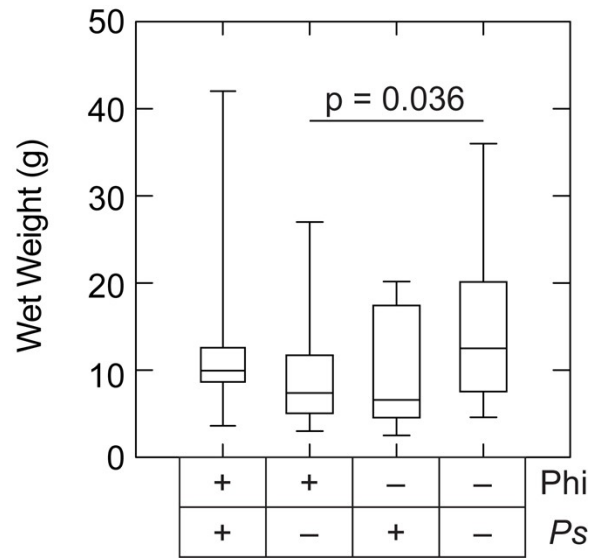

**Figure S9.** Box-and-whisker plot of radish wet weight following growth in soil containing Phi alone ( $n = 27$ ), *P. stutzeri* (*Ps*,  $n = 7$ ), both ( $n = 34$ ), or neither ( $n = 23$ ). Samples containing just *Ps* or both *Ps* and Phi exhibited  $p > 0.05$  with respect to the null.
